# Supplementary material for: Macrobenthic community responses to multiple environmental stressors in a subtropical estuary
Source: PeerJ. 2021 Dec 7;9:e12427. doi: 10.7717/peerj.12427 (PMC8663631; doi:10.7717/peerj.12427)
Supplement: Supplemental Information 7 [file peerj-09-12427-s007.xlsx]

## Sheet: Planilha1
Site	Depth (m)	Mean grain size (µm)	Silt + Clay (%)	Organic Matter (%)	Cr (mg/kg)	Cu (mg/kg)	Ni (mg/kg)	Zn (mg/kg)
1	24.1936	383.62	7.26	2.34	43.1927	15.6442	17.3933	113.107
2	1.66335	166.95	16.1	3.17	37.0862	11.3703	14.661	94.422
3	10.0797	240.7	13.86	3.48	52.0434	15.4418	20.2296	114.116
4	1.19283	147.68	24.64	3.93	37.465	11.8934	14.1259	92.8554
5	1.2905	223.43	12.79	1.84	36.3838	10.707	13.7038	87.2471
6	1.48229	177.97	17.55	1.43	42.1891	14.1848	15.8579	113.556
7	1.34655	195.7	12.79	3.43	42.0035	12.5238	15.8077	103.198
8	7.60667	213.94	6.88	3.88	50.3481	16.2425	19.2185	119.392
9	3.71274	155.46	21.83	7.3	55.6007	15.1156	20.5514	113.06
10	16.4091	239.03	7.8	4.89	58.7718	18.9292	21.8964	140.442
11	4.06984	204.26	11.44	4.73	65.8331	17.2741	22.9312	119.664
12	2.60745	188.97	20.98	10.64	60.8586	19.126	23.4913	150.894
13	3.70769	124.05	41.79	9.7	62.9281	20.7247	23.6667	160.253
14	0.949105	180.91	11.48	4.68	58.3882	17.8823	22.5115	142.615
15	3.66185	301.37	9.53	4.12	58.2091	16.6248	20.3556	122.434
16	3.17592	158.55	20.7	5.65	74.9832	22.1594	28.7901	148.74
17	5.8673	854.04	1.09	0.81	28.0945	15.327	10.5801	48.7225
18	7.3122	750.32	0.1	0.93	30.6469	13.0681	12.2052	45.9635
19	2.54593	77.08	48.67	5.4	102.175	33.3978	41.8561	198.873
20	5.61735	308.31	22.77	0.21	83.0214	18.1712	26.8193	115.595
21	11.3212	224.7	14.33	2.77	63.7679	17.7615	24.4753	116.936
22	12.1219	321.75	8.79	4.31	67.0306	18.1289	24.6857	115.778
23	1.74765	155.5	23.39	7.66	71.5623	22.3723	25.8066	174.576
24	3.50404	112.39	35.12	10.71	87.6931	35.8757	26.5535	294.463
25	2.31086	123.2	31.25	10.03	97.399	41.83	30.6682	369.002
26	1.61709	124.27	33.09	13.26	71.3047	23.2161	26.6932	188.975
27	1.64318	194.9	14.16	2.63	61.3796	19.384	21.6251	167.45
28	1.81632	158.46	20.3	3.27	61.1079	19.4251	21.8136	160.856
29	7.45451	182.39	26.99	1.09	54.4318	23.8084	27.414	113.33
30	0.521657	156.18	20.5	6.96	65.4944	19.057	24.5188	160.024
31	3.34678	134.22	27.94	9.6	64.3444	19.614	22.6838	159.679
32	1.06638	201.76	19.66	9.18	63.6579	19.168	21.2452	150.128
33	19.4793	337.25	0.22	0.54	44.4249	18.0814	17.0422	80.9073
34	13.2849	186.62	7.99	3.43	49.8627	14.1323	19.0843	108.844
35	9.69303	71.3	56.95	2.49	53.4646	16.0785	20.5887	119.846
