# Supplementary material for: Macrobenthic community responses to multiple environmental stressors in a subtropical estuary
Source: PeerJ. 2021 Dec 7;9:e12427. doi: 10.7717/peerj.12427 (PMC8663631; doi:10.7717/peerj.12427)
Supplement: Supplemental Information 8 [file peerj-09-12427-s008.xlsx]

## Sheet: Planilha1
Site	Magelona.papillicornis	Caprella	Mytella.guyanensis	Polydora	Sternaspis	Bulla.striata	Streblospio.benedicti	Capitellidae	Glycinde.multidens	Prionospio.steenstrupi	Owenia	Hermundura.tricuspis	Sigambra	Mytella.charruana	Nemertea	Isolda.pulchella	Heleobia.australis	Sabellaria	Scoloplos	Sthenelais.limicola	Aricidea	Sphenia.fragilis	Syllidae	Bivalvia	Mysida	Anemonia	Sabellidae	Exogone	Brachyura	Magelona.variolamellata	Lumbrineridae	Neanthes.bruaca	Holothuroidea	Platyhelminthes	Capitella	Chione	Oligochaeta	Anomalocardia.flexuosa	Amphipoda	Gyptis	Sipuncula	Alitta.succinea	Paraprionospio.pinnata	Spiophanes.duplex	Tagelus.divisus	Cirratulidae	Dorvilleidae	Alpheus.heterochaelis	Onuphidae
1	0	0	0	0	0	0	0	1	0	0	0.333333	0	0	0	1	0	0	0	0.333333	0	0	1	12.6667	2.33333	0.333333	7.66667	0	0.333333	0.666667	0	2	0.333333	0.333333	0	0.333333	0.333333	0	0	1.33333	0.333333	0	1	0	0	0	6	0.333333	0	0
2	1.66667	1.66667	0	11	7.33333	6.66667	0	3.66667	2	27	0.333333	7	0.666667	0	3.66667	19.3333	0.666667	0	3	0.333333	23.3333	0	0.333333	5	0	0	0.666667	0	0	0	7.33333	0	0	0	0.333333	0	0.333333	3.66667	0.333333	0.333333	1.66667	0.666667	0	0	0	0	0	0	0
3	0.333333	0	0	0	0	0	0	4.33333	0	0	2.66667	0	0	0	0.666667	0	0	0	0	1.66667	0	0	0	0	0	0	0	0	0.666667	0.333333	0	1.33333	0.333333	0	0	0	0	0	0	0	0	0	0	0	0	0.333333	0	0	0
4	0	0.333333	0	10.6667	0	0	8	12.6667	1.33333	5.33333	0.333333	0	0.333333	0	0	0	0	0	1	0	0	0	0	0	0	0	0.333333	0	0.666667	0	0	0	0	0	0	0	3	0.666667	0	0	0	0	0	0	0.333333	1	0	0	0
5	15	1	0	0.333333	7	7.33333	0.666667	1	7	10	1.66667	2.33333	0.333333	0	3	2	0	0	11.3333	0	0.333333	0.333333	2	9.33333	0	0	0	0	0	0	5.33333	0	6	0.666667	0	0	0	5.33333	1.33333	0	0.333333	0	1.66667	5.33333	1.33333	0	0	0.666667	3.33333
6	16.3333	171.333	0	0.666667	1.33333	6	0	4.66667	9	34	0.666667	2	0.666667	0.666667	5.33333	2	0	0	7.33333	0	0	3	3.66667	2.66667	0.666667	0	1.33333	0.666667	0.666667	0	3.66667	0	0.666667	0.333333	0	0.333333	3.33333	4.66667	2.33333	0.333333	1	1.33333	0.666667	0.666667	0.666667	0.666667	0	0.666667	1.33333
7	20.6667	7.66667	0	10	80.6667	3	0.666667	2	3	1.66667	1.66667	2.33333	0.666667	0	4	0.333333	0.333333	0	1.33333	1.66667	4	0	0	7.66667	0	0	0	0	0.666667	0	3	0	10.6667	0	0	0	0	0	1.66667	0	2	0	1.33333	0	0.333333	0	0.666667	0	0
8	0.666667	0.333333	0	0	1	0	0.333333	4.33333	0	0	3.66667	0	0	0	1	0	0	0	0	1.33333	0	0	0	1.66667	0	0	0	0	3.66667	0	1	1.33333	0	0	0.333333	0	0	0	0	0	0	0	3.33333	0	0	0	0	0	0
9	5	0	0	0	1	0	0	3.66667	0	0.333333	1	0	0	0	2.66667	0	0	0	0	1.33333	0.333333	0	0.333333	0.333333	0	0	0	0	0.333333	2.66667	0	0.666667	0.333333	0	0	0	0	0	0	0	0	0	1	0.333333	0	0	0	0.333333	0
10	0	0	0	0	0	0	0	0	0	0	0.333333	0	0	0	0.333333	0	0	0	0	0	0	0	0	0	0	0	0	0	0	0	0	0	0	0	0	0	0	0	0	0	0	0	0.333333	0	0	0	0	0	0
11	26.3333	0.333333	0	0.333333	6	0	0.666667	1.66667	0.666667	0	51.6667	2	0	0	1.66667	0	0.666667	0	0	2.66667	2.33333	0	0.666667	1.66667	0	0	0	0	0.333333	4.33333	0	0.333333	0	0.333333	0	0	0	0	0	0.333333	0	0	1	0.333333	0.333333	0	0	0.333333	0
12	0.333333	0	0	0.333333	15.6667	0	0	0.333333	0	1.33333	0	0	0.333333	0	1	0	0	0	0	0.666667	0	0	0	1	0.666667	0	0	0	0	0	0	0.333333	0	0	0	0	0	0	0	0	0.666667	0	0.666667	0	0	0	0	1	0
13	4.66667	1.66667	0	0.666667	2.33333	0	0	0.333333	0.333333	0	0	0	1	0	2.33333	0	0.666667	0	0	3	0.333333	0	0.666667	1.66667	1.33333	0	0	0	1	0	0	2	0	0	0	0	0	0	0	0.666667	0.333333	0	1.66667	0	0	0.666667	0.333333	0	1.33333
14	19.6667	83.3333	0	17.3333	4.66667	41	1.33333	1	8	2.33333	0	16.3333	1.33333	0	3	0	0	0	0	3.66667	1	0.666667	0	2.66667	0	0	0	0	2.66667	1.66667	0	3.66667	0.333333	3.66667	0.333333	0	0.333333	0	0	0.666667	0	0	0	0.333333	3	0	0.333333	0	0.666667
15	80	0.333333	0	0.333333	14.6667	0.666667	0	0.666667	1.33333	0	5	6	0	0	0.666667	0.333333	0	0	0.666667	8	0.666667	0	0.333333	0.333333	0.666667	0	0	0	0.333333	9.66667	0	3.33333	0.333333	0	0.333333	0	0	0	0.333333	0	0	0	0.666667	0.333333	0.333333	0	0	2	1
16	15.3333	2.33333	0	2.33333	1	11.3333	0	2	0.666667	0	0	0.666667	0.333333	0	0	0	3	0	0	5	0.333333	1.33333	0	0.333333	0	0	0	0	0.333333	1.33333	0	1.33333	0.333333	0.333333	0	0	0.333333	0	0	0	0.333333	0	0	0	0.333333	0	0	0	0
17	0	0	0	0	0	0	0	0	1.33333	0	0	0	0	0	0	0	0	0	0.333333	0	2.33333	0	2	0.333333	0	0	0	0	0	0	0.333333	0	0	0	0	0	0	0	0.666667	0	0	0	0	0	0	0	0	0	0
18	0	0	0	0	0	0	0	0	1	0	0	0	0	0	0	0	0	0	0	0	0	0	0	0	0	0	0	0	0	0	0	0	0	0	0	0	0	0	0.666667	0	0	0	0	0	0	0	0	0	0
19	0	1	0	1.33333	1	4.33333	11.3333	0.333333	2.33333	0	0	1	17.6667	0	1	0	0.333333	0	0	0.333333	0	0	0	0.333333	1.33333	0	0	0	0	0	0	0	0	1.33333	1	0	0	0	0	1.66667	0	0	0	0	0.333333	0	0	0	0
20	35	0.666667	64.3333	0.666667	2.66667	0	0	0.666667	1.33333	0	2.66667	8.33333	0	0	0.666667	0	31.6667	0	2.33333	3.33333	0.333333	0.666667	0	0	0	0	0	0	0	0.333333	0	0.666667	0.333333	0	0	0	0	0	0.666667	0.666667	0.333333	0	0.333333	2	0.333333	0	0	0	2.33333
21	26.6667	0	0	0.666667	0.333333	0	0	0	1	0	1.66667	1.66667	0	0	7.33333	6.66667	0	52.6667	0	0	6	30	1.33333	0	0	25.6667	24.6667	0	2.33333	0	0	0	0	1	0	0	0	0	0.666667	0.333333	2.66667	0.333333	0	0.333333	2.33333	0	6	0.333333	0
22	3.33333	0	0	0	0	0	0	1	0.666667	0	0	2.66667	0.333333	0	0	0	0.666667	0	2.33333	0	0.333333	0	0	0	0	0.333333	0	0	0.333333	0	0	0	0	0	0	0	0	0	0	0	0	0	0	0.333333	0	0	0.666667	0	0
23	3.33333	0	0	4	0.333333	19.3333	21.3333	7	21	4.66667	0	0	14.3333	0.333333	3.66667	0	0.666667	0	4.33333	1	0	0.333333	8.66667	0	0.333333	0	0	28	0.666667	0	0	0.333333	0	6.33333	0.333333	0	3.33333	2.33333	0.333333	0.666667	0	0	0.333333	0	2.33333	0	0	2.33333	0
24	0.666667	0.333333	0	0	0.333333	0.333333	0	1.33333	0.666667	0	0	3.66667	0.333333	0	0.333333	0	13.6667	0	0.333333	3.33333	0	0	0	0	0.333333	0	0	0	0	0	0	0	0	0	0.333333	0	0	0	0	0	0	0	0	0	0	0	0	0	0
25	0	0.666667	0	41.3333	0	1	71.3333	1.66667	8.66667	0	0	0	9	0	2.33333	0	0.333333	0	0	0.666667	0	0	0.333333	0.333333	0.333333	0	0	0	0	0	0	0	0	0	1	0	0	0	0	1.66667	0.333333	0.333333	0	0	0.333333	0	0	2	0
26	0	0	0	0.333333	0	0.333333	0.333333	0.333333	1.33333	0	0	2	1.66667	12.3333	0	0	0	0	0.666667	0	0	0	0	0.333333	28.3333	0	0	0	0	0	0	1.33333	0	0	0.333333	0	0	0	0	1	0	9.33333	0	0	0	0	0	0	0
27	52.3333	19.3333	0	17	11	44.3333	0	0.666667	4.33333	5.33333	0.666667	10.6667	0	0	3	0	0	0	3	2	0	3.66667	0	0.666667	0	0	0.666667	0.333333	0	1	0	1	0	1	0	0	0.333333	0	0	2.66667	0	0	0	0	0	0	0	0	0
28	6.33333	0	0	36	0.333333	2.66667	2	15.6667	7.66667	7.33333	0	1.33333	4	0	2.66667	0	0	0	1.33333	0.333333	0	0	0	0	0.666667	0	0	1.33333	1.33333	0	0	1.33333	0	0	4.66667	0	0.666667	0	0	0.333333	0.666667	0.333333	0	0	1.66667	0	0	0.666667	0
29	17	0	0	0	0.333333	1.66667	0	0	2	0	0	5.66667	0	0	0.666667	0	0	0	2.66667	0	0	0	0	0	0.333333	0	0	0	0	0	0	0	0	0	1.66667	0	0.333333	0	2	0	0	0	0	0	0	0	0	0	0
30	5.33333	2.66667	0	4.33333	0	2.66667	9	15.3333	7	1.66667	0	1.66667	9.33333	0.333333	4.33333	0	0	0	0.666667	0.333333	0	0	0	0.333333	0	0	0	2.33333	0	0	0	0.333333	0	0	4.33333	0	2.66667	0	0.666667	0.666667	1	0	0	0.333333	0	0	0	0	0
31	0.333333	8	212	3.66667	0	0	0.333333	3	0	0	0	0.666667	0.333333	50.3333	1	0	0.333333	0	0.333333	0.666667	0	0	4	0.333333	0	0	0	0	0.666667	0	0	0.333333	0	0.666667	1.33333	0	0	0	1	0.666667	0.333333	0	0	0	0	0	1.33333	0	0
32	0.333333	1.66667	0	25	2.66667	9	7.33333	4.66667	8.66667	0.333333	0	0.666667	6	0	2.66667	0	2.33333	0	0.666667	1.66667	0	0	0	0	0	0	4.66667	0	0	0	0	0	0	3	1.33333	0	2.66667	0	0	1.66667	0.333333	0.333333	0	0	0	0	0	0	0
33	0	0	0	0	0	0	0	0	0	0	0	0	0.333333	0	0	0	0	0	4	0	0.666667	0	0.333333	0.666667	0.666667	0	0	0	0	0	0	0	0	0	0	0	0	0.333333	1.66667	0	0	0	0	2.33333	0	3.66667	0	0	0
34	0.666667	0	0	0	0.333333	0	0	16	2	0	2	0.333333	0	0	1	0.333333	0	0	0.333333	3.66667	0	0	0	0	0.666667	0	0	0	3	2.66667	0	1.33333	0.333333	0	0	0.666667	0	0	0	0	0	0	0.333333	0	0	0	0	0	0
35	1	0	0	0.666667	0	0	0	1.33333	0	0	4	0	0.333333	0	2	26.6667	0	0	0.666667	0.333333	1	1	4	0	0.333333	0	1.33333	0	8	2.33333	1.33333	1	0	0	0	16	0	0	1	0	2.66667	0.333333	0.666667	1.33333	0	0	1.66667	0.333333	0.666667
[truncated: 86 more columns]
